# Supplementary material for: Ultrafine Ir nanoparticles decorated on FeP/FeOOH with abundant interfacesviaa facile corrosive approach for alkaline water-splitting
Source: Royal Society of Chemistry journal article supplement (doi:10.1039/d1ta02658e), 2021-01-01
Supplement: d1ta02658e4.pdf [file d1ta02658e4.pdf]

## ***Supporting Information***

### **Ultrafine Ir Nanoparticles Decorated on FeP/FeOOH with Abundant Interface via Facile Corrosive Approach for Alkaline Water-splitting**

Zongshi Zhao<sup>1, #</sup>, Wei Jin<sup>3, #</sup>, Li Xu<sup>5</sup>, Chan Wang<sup>1, \*</sup>, Yang Zhang<sup>4, \*</sup>, Zexing Wu<sup>2, \*</sup>

1. School of Chemical and Material Engineering, Jiangnan University, Wuxi 214122, China. E-mail: wangchan@jiangnan.edu.cn

2. State Key Laboratory Base of Eco-Chemical Engineering, College of Chemistry and Molecular Engineering, Qingdao University of Science & Technology, 53 Zhengzhou Road, 266042, Qingdao, P. R. China. E-mail: splswzx@qust.edu.cn

3. State Key Laboratory of Pollution Control and Resources Reuse School of Environmental Science and Engineering, Tongji University 1239 Siping Road, Shanghai 200092, China

4. Institute of Process Engineering, Chinese Academy of Sciences, 1st Bei-er-tiao Zhongguancun, Beijing 100190, P. R. China E-mail: yangzhang@ipe.ac.cn

5. Shanghai Institute of Planned Parenthood Research, 2140 Xietu Road, Shanghai 200032, People's Republic of China

# The authors contributed equally to this work.

## 1. Experimental Section

### 1.1 Materials and synthesis

**Materials:** Fe Foam (FF) with the thickness of 2 mm was purchased from Kunshan Tengerhui Electronic Technology Co., Ltd. Sodium chloride (NaCl), Sodium hypophosphite monohydrate ( $\text{NaH}_2\text{PO}_2 \cdot \text{H}_2\text{O}$ ), Potassium hydroxide (KOH) were purchased from Sinopharm Chemical Reagent Co., Ltd. Iridium chloride ( $\text{IrCl}_3$ ) was purchased from Shanghai Macklin Biochemical Co., Ltd. Deionized water was utilized in all the experimental process. All the chemicals and reagents used in the experiment were directly used without further purification.

**Synthesis of FF-NaCl-Ir Catalysts:** The FF-NaCl-Ir catalysts were synthesized by a one-step oxygen corrosion method. Put a slice of FF (2 cm\*2 cm), NaCl (0.0087 g),  $\text{IrCl}_3$  (0.0448 g) into a beaker with 30 mL deionized (DI) water and stirred at room temperature (25 °C) for one hour. Then, the product was collected and washed by deionized water several times. Finally, the product was dried at 60 °C under vacuum for 12 h and denoted as FF-NaCl-Ir.

**Synthesis of FF-NaCl-Ir-P Catalysts:** Under the protection of nitrogen, put FF-NaCl-Ir catalysts and  $\text{NaH}_2\text{PO}_2 \cdot \text{H}_2\text{O}$  in a tube furnace and then heated up to 360 °C in Ar for 2 h with a heating rate of 3 °C min to obtain FF-NaCl-Ir-P.

### 1.2 Material characterization

The morphologies of the catalyst is characterized by the scanning electron microscopy (SEM, S-4800, Hitachi) and transmission electron microscopy (TEM, JSM-2100). The composition and valence of elements are proved by X-ray photoelectron spectroscopy

(XPS, AXISULTRA DLD). The crystal structure of the material is proved by X-ray diffraction (XRD, X'Pert PRO). The contact angle is measured by Dataphysics-OCA40. The XRD test is a direct test of the synthesized catalyst block. The TEM test is to make the synthesized catalyst block into powder.

### ***1.3 Electrochemical measurements***

All the electrochemical tests were performed by using a CHI 760E electrochemical workstation with a three-electrode system at room temperature. A 1.0 M KOH solution was used as the electrolyte, FF products as the working electrode, a graphite rod as the counter electrode, and Ag/AgCl as the reference electrode. For comparison, all potentials were adjusted to the reversible hydrogen electrode (RHE).

$$E(\text{RHE}) = E(\text{Ag/AgCl}) + 0.059 \cdot \text{pH} + 0.197.$$

The polarization curve of the electrode was obtained by linear sweep voltammetry (LSV) test with a scanning rate of 5 mV s<sup>-1</sup>. During the electrochemical test, we immersed catalyst FF-NaCl-Ir-P with an area of 1 cm\*0.5 cm into the electrolyte. In LSV test, the voltage setting intervals of HER, OER and water splitting are (-0.9V, -1.5V), (0V, 0.8V) and (0V, 3V) respectively. When testing commercial catalyst, the immersion area and voltage setting interval are the same as that of catalyst FF-NaCl-Ir-P. Long term stability measurements were performed at a specific potential. Overall water splitting measurements were performed using a CHI 760E potentiostat in a two-electrode system by applying FF-NaCl-Ir-P as the cathode and anode.

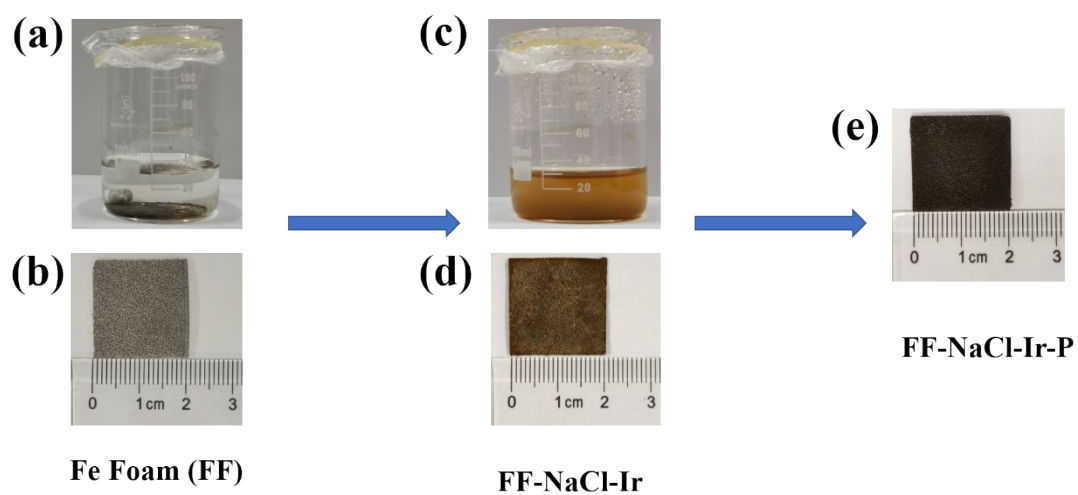

**Figure S1.** Pictures of the preparation process

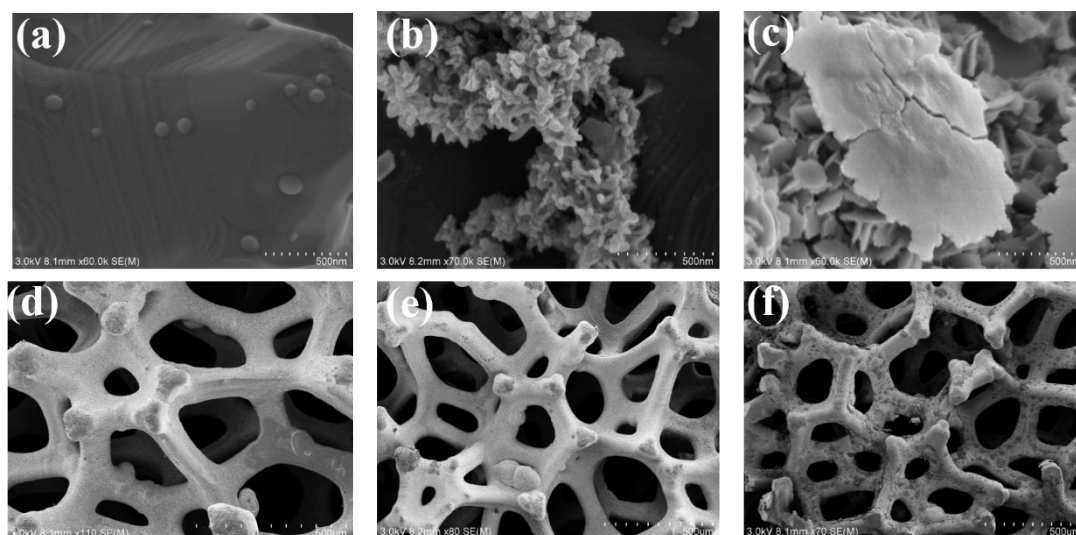

**Figure S2.** SEM images of Fe Foam (a, d), FF-NaCl (b, e) and FF-NaCl-Ir (c, f)

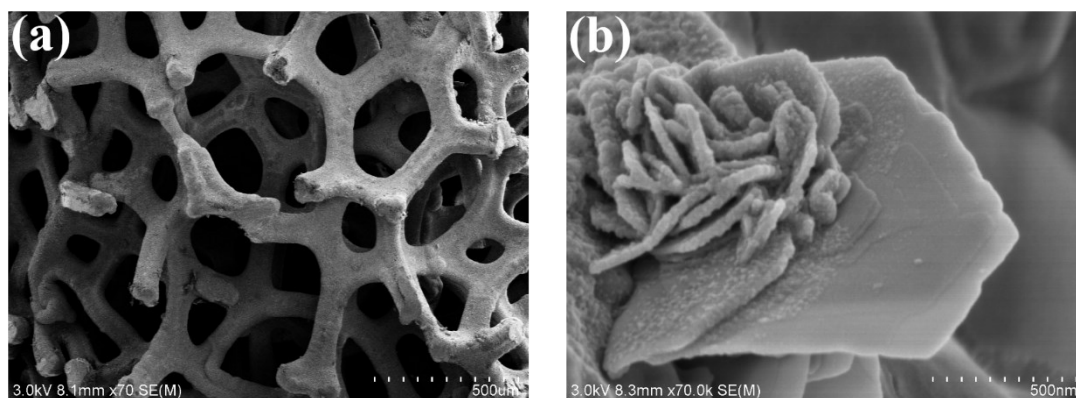

**Figure S3.** SEM images of FF-NaCl-Ir-P

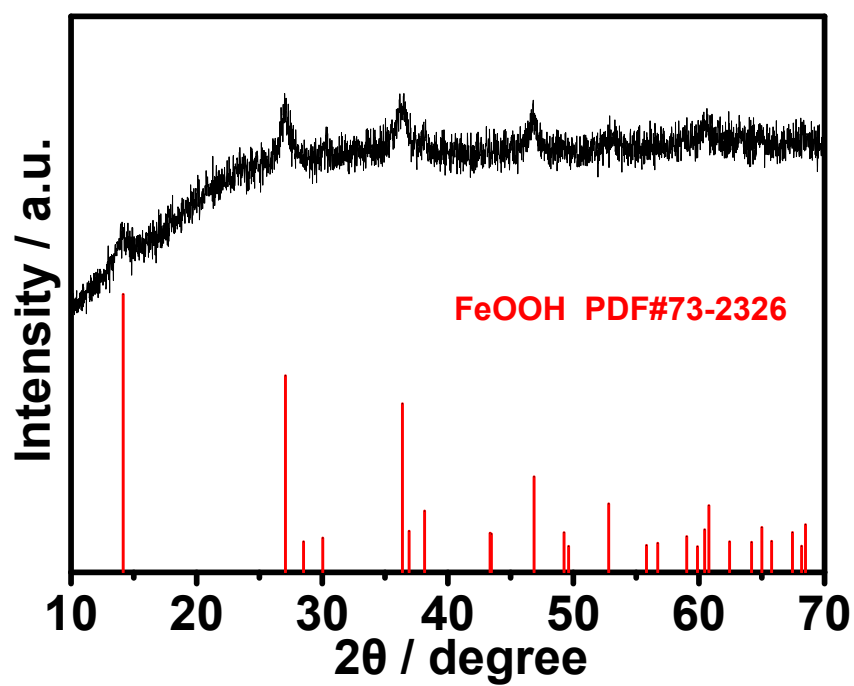

**Figure S4.** XRD pattern of FF-NaCl

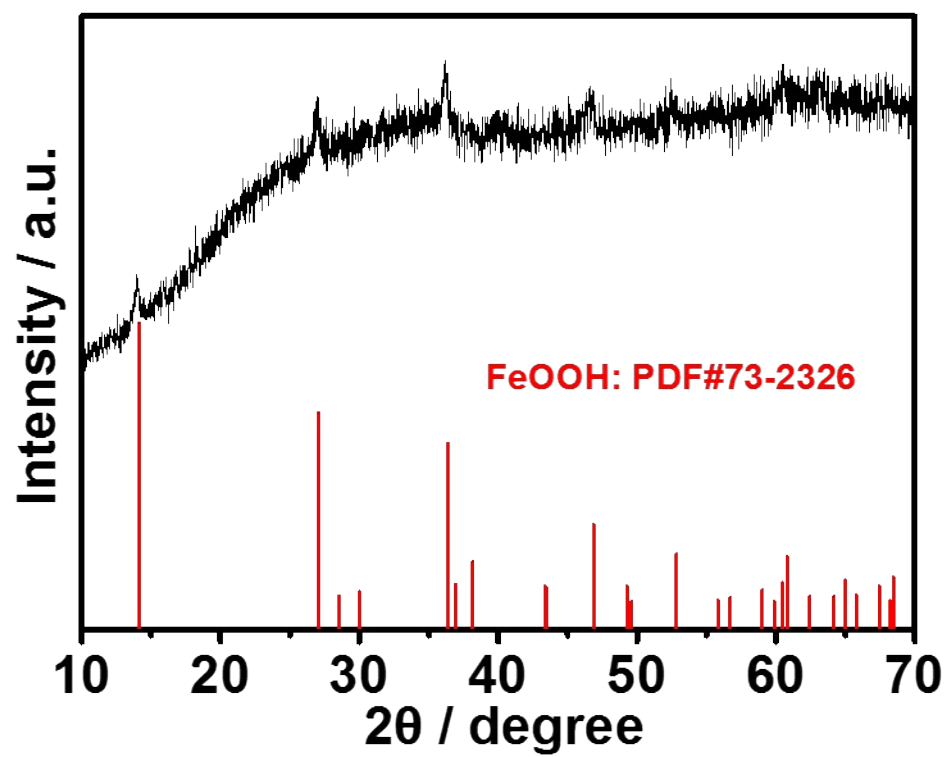

**Figure S5.** XRD pattern of FF-NaCl-Ir

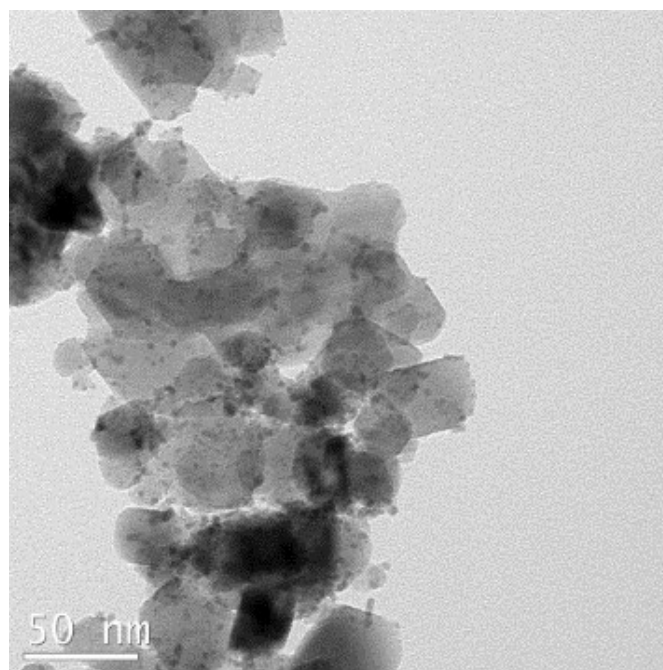

**Figure S6.** TEM image of FF-NaCl-Ir-P.

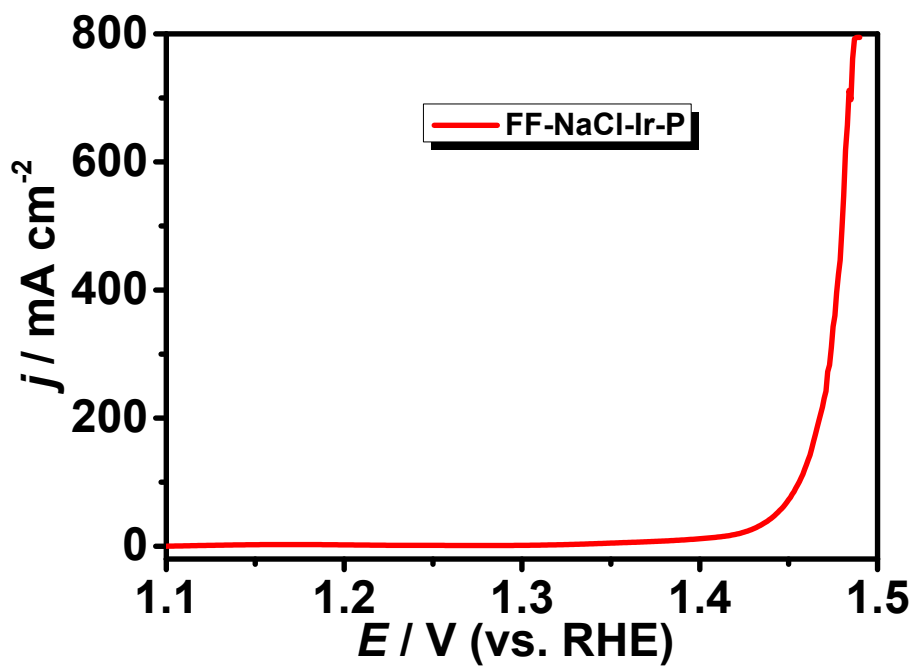

Figure S7. LSV of FF-NaCl-Ir-P

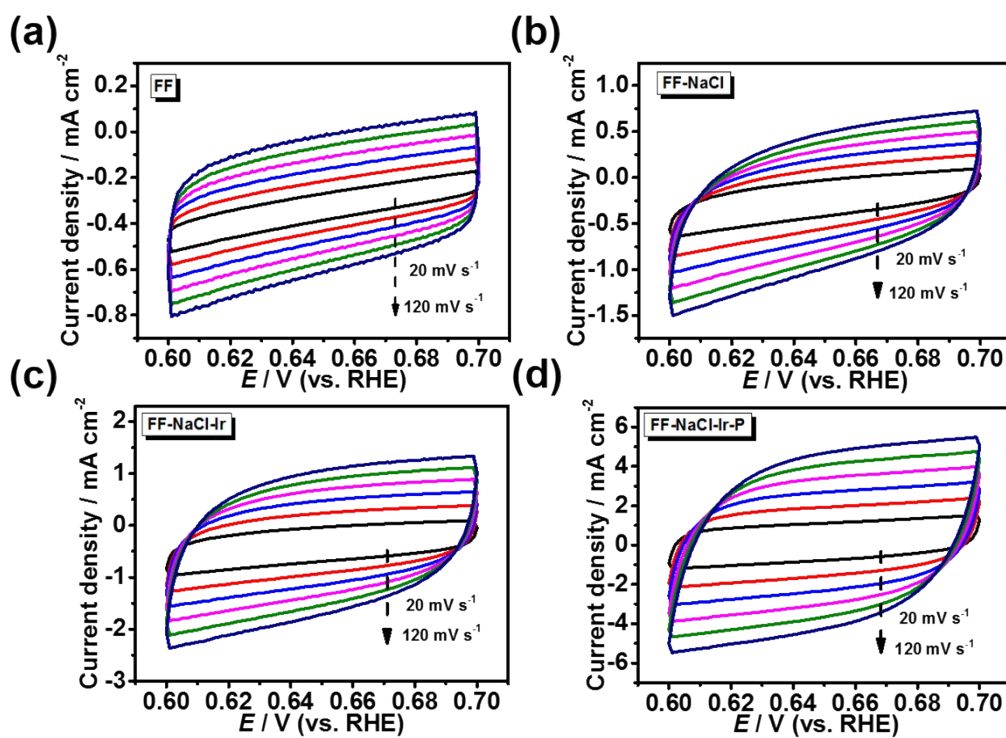

Figure S8. CV curves in the potential range from 0.6 V to 0.7 V at various scan rates in 1 M KOH solution: (a) FF, (b) FF-NaCl, (c) FF-NaCl-Ir and (d) FF-NaCl-Ir-P

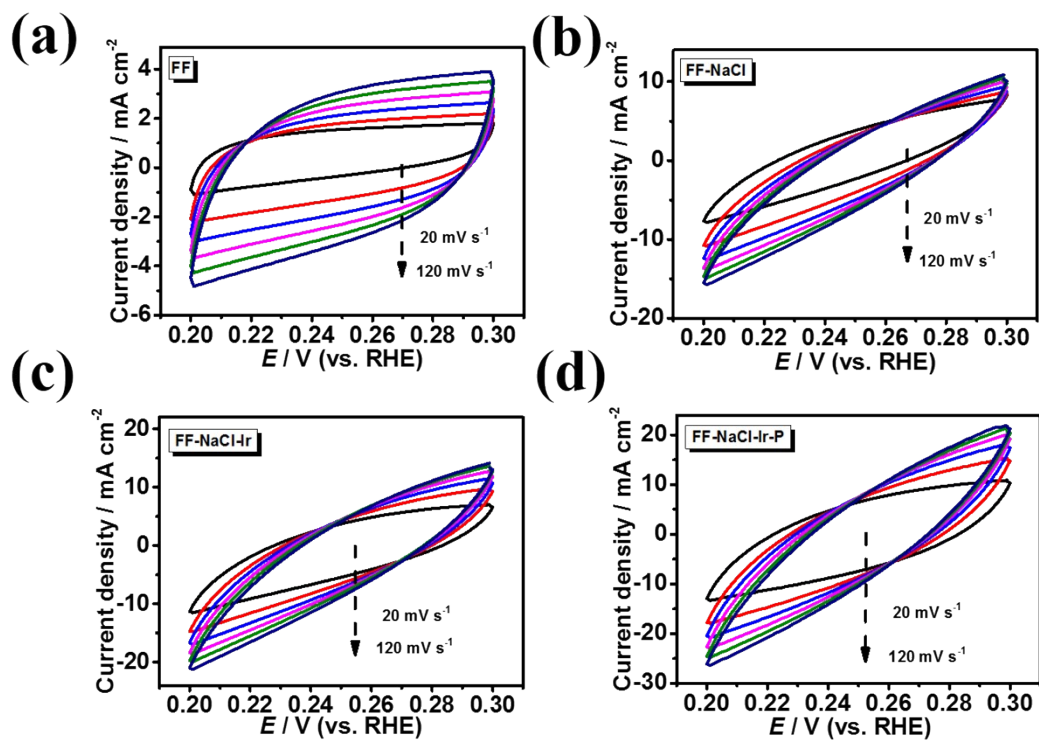

**Figure S9.** CV curves in the potential range from 0.2 V to 0.3 V at various scan rates in 1 M KOH solution: (a) FF, (b) FF-NaCl, (c) FF-NaCl-Ir and (d) FF-NaCl-Ir-P

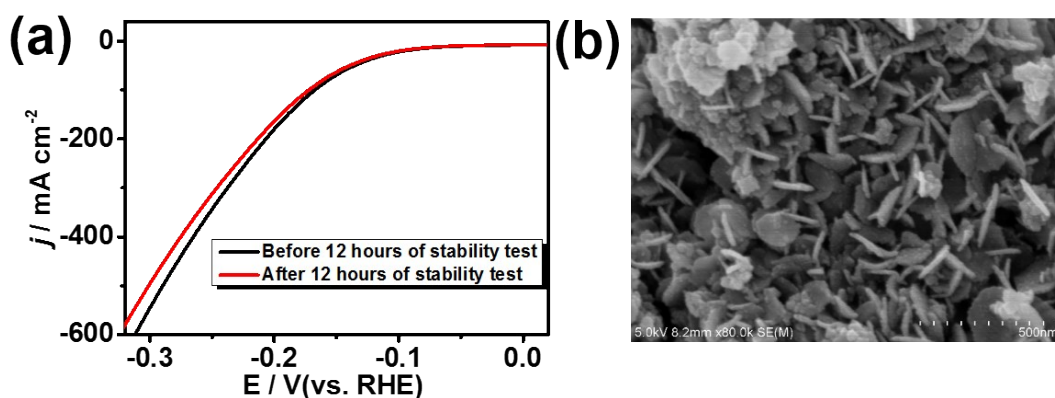

**Figure S10.** (a) LSVs of FF-NaCl-Ir-P before and after 12 hours chronopotentiometry measurement. (b) SEM image of FF-NaCl-Ir-P after 12 hours of HER.

**Table S1.** Comparative electrochemical OER performances of different electrocatalytic materials in alkaline medium

| Catalysts                                                 | Electrolyte      | Overpotential / mV<br>(10 mA cm <sup>-2</sup> ) | Ref.             |
|-----------------------------------------------------------|------------------|-------------------------------------------------|------------------|
| <b>FF-NaCl-Ir-P</b>                                       | <b>1.0 M KOH</b> | <b>169</b>                                      | <b>This work</b> |
| NiCo-Ir-5                                                 | 1.0 M KOH        | 240                                             | 1                |
| CoIr-0.2                                                  | 1.0 M KOH        | 235                                             | 2                |
| Ir@Co nanosheets                                          | 1.0 M KOH        | 273                                             | 3                |
| NiVIr LDH                                                 | 1.0 M KOH        | 203                                             | 4                |
| Ru/NiFe LDH-F/NF                                          | 1.0 M KOH        | 230                                             | 5                |
| Ru <sub>1</sub> Co <sub>2</sub> NP                        | 1.0 M KOH        | 240                                             | 6                |
| Ir-NiCo-LDH                                               | 1.0 M KOH        | 192                                             | 7                |
| Fe <sub>1.0</sub> CO <sub>1.1</sub> Ni <sub>1.4</sub> -NC | 1.0 M KOH        | 270                                             | 8                |
| Fe <sub>MOFs</sub> -SO <sub>3</sub>                       | 1.0 M KOH        | 218                                             | 9                |
| Ru-NiFeP/NF                                               | 1.0 M KOH        | 179                                             | 10               |

**Table S2.** Comparative electrochemical HER performances of different electrocatalytic materials in alkaline medium

| Catalysts                                                 | Electrolyte      | Overpotential / mV<br>(10 mA cm <sup>-2</sup> ) | Ref.             |
|-----------------------------------------------------------|------------------|-------------------------------------------------|------------------|
| <b>FF-NaCl-Ir-P</b>                                       | <b>1.0 M KOH</b> | <b>69</b>                                       | <b>This work</b> |
| Pt- $\alpha$ Fe <sub>2</sub> O <sub>3</sub> /NF           | 1.0 M KOH        | 90                                              | 11               |
| NiVIr LDH                                                 | 1.0 M KOH        | 41                                              | 4                |
| Ru/NiFe LDH-F/NF                                          | 1.0 M KOH        | 116                                             | 5                |
| Ru <sub>1</sub> Co <sub>2</sub> NP                        | 1.0 M KOH        | 188                                             | 6                |
| Ru <sub>2</sub> P                                         | 1.0 M KOH        | 57                                              | 12               |
| Ru-WSe <sub>2</sub>                                       | 1.0 M KOH        | 87                                              | 13               |
| Fe <sub>1.0</sub> CO <sub>1.1</sub> Ni <sub>1.4</sub> -NC | 1.0 M KOH        | 175                                             | 8                |
| Ru-NiFeP/NF                                               | 1.0 M KOH        | 56                                              | 10               |
| NiFe-MOF-74                                               | 1.0 M KOH        | 195                                             | 14               |

**Table S3.** Comparative electrochemical overall water splitting performances of different electrocatalytic materials

| Catalysts                                                 | Electrolyte                          | Overall Voltage (V)<br>@ 10 mA cm <sup>-2</sup> | Ref.             |
|-----------------------------------------------------------|--------------------------------------|-------------------------------------------------|------------------|
| <b>FF-NaCl-Ir-P</b>                                       | <b>1.0 M KOH</b>                     | <b>1.47</b>                                     | <b>This work</b> |
| NiVIr LDH                                                 | 1.0 M KOH                            | 1.49                                            | 4                |
| FeCoRuP                                                   | 1.0 M KOH                            | 1.47                                            | 15               |
| Pt- $\alpha$ Fe <sub>2</sub> O <sub>3</sub> /NF           | 1.0 M KOH                            | 1.51                                            | 11               |
| Ru/NiFe LDH-F/NF                                          | 1.0 M KOH                            | 1.53                                            | 5                |
| Ru <sub>1</sub> Co <sub>2</sub> NP                        | 1.0 M KOH                            | 1.59                                            | 6                |
| np-IrO <sub>2</sub>   IrAl                                | 0.5 M H <sub>2</sub> SO <sub>4</sub> | 1.52                                            | 16               |
| Fe <sub>1.0</sub> Co <sub>1.1</sub> Ni <sub>1.4</sub> -NC | 1.0 M KOH                            | 1.52                                            | 8                |
| IrCo <sub>0.14</sub> NRs                                  | 0.1 M HClO <sub>4</sub>              | 1.53                                            | 17               |
| Ru-NiFeP/NF                                               | 1.0 M KOH                            | 1.47                                            | 10               |
| NiFe-MOF-74                                               | 1.0 M KOH                            | 1.58                                            | 14               |

1. T. Huang, S. K. Moon and J.-M. Lee, *Electrochimica Acta*, 2019, **296**, 590-597.
2. Y. Zhang, C. Wu, H. Jiang, Y. Lin, H. Liu, Q. He, S. Chen, T. Duan and L. Song, *Advanced Materials*, 2018, **30**, 1707522.
3. D. D. Babu, Y. Huang, G. Anandhababu, X. Wang, R. Si, M. Wu, Q. Li, Y. Wang and J. Yao, *Journal of Materials Chemistry A*, 2019, **7**, 8376-8383.
4. S. Li, C. Xi, Y.-Z. Jin, D. Wu, J.-Q. Wang, T. Liu, H.-B. Wang, C.-K. Dong, H. Liu, S. A. Kulinich and X.-W. Du, *ACS Energy Letters*, 2019, **4**, 1823-1829.
5. Y. Wu, S. Ji, H. Wang, B. G. Pollet, X. Wang and R. Wang, *Applied Surface Science*, 2020, **528**, 146972.
6. Y. Bao, J. Dai, J. Zhao, Y. Wu, C. Li, L. Ji, X. Zhang and F. Yang, *ACS Applied Energy Materials*, 2020, **3**, 1869-1874.
7. R. Fan, Q. Mu, Z. Wei, Y. Peng and M. Shen, *Journal of Materials Chemistry A*, 2020, **8**, 9871-9881.
8. M. Khalid, A. M. B. Honorato, G. Tremiliosi Filho and H. Varela, *Journal of Materials Chemistry A*, 2020, **8**, 9021-9031.
9. K. Feng, D. Zhang, F. Liu, H. Li, J. Xu, Y. Xia, Y. Li, H. Lin, S. Wang, M. Shao, Z. Kang and J. Zhong, *Advanced Energy Materials*, 2020, **10**, 2000184.
10. Y. Lin, M. Zhang, L. Zhao, L. Wang, D. Cao and Y. Gong, *Applied Surface Science*, 2021, **536**, 147952.
11. B. Ye, L. Huang, Y. Hou, R. Jiang, L. Sun, Z. Yu, B. Zhang, Y. Huang and Y. Zhang, *Journal of Materials Chemistry A*, 2019, **7**, 11379-11386.
12. Z. Wu, D. Nie, M. Song, T. Jiao, G. Fu and X. Liu, *Nanoscale*, 2019, **11**, 7506-7512.
13. Y. Zhao, G. Mao, C. Huang, P. Cai, G. Cheng and W. Luo, *Inorganic Chemistry Frontiers*, 2019,

- 6**, 1382-1387.
14. C. Chen, N. Suo, X. Han, X. He, Z. Dou, Z. Lin and L. Cui, *Journal of Alloys and Compounds*, 2021, **865**, 158795.
  15. H. Liu, X. Li, L. Ge, C. Peng, L. Zhu, W. Zou, J. Chen, Q. Wu, Y. Zhang, H. Huang, J. Wang, Z. Cheng, Z. Fu and Y. Lu, *Catalysis Science & Technology*, 2020, **10**, 8314-8324.
  16. Q. Li, J. Li, J. Xu, N. Zhang, Y. Li, L. Liu, D. Pan, Z. Wang and F. L. Deepak, *ACS Applied Energy Materials*, 2020, **3**, 3736-3744.
  17. W. Gao, Q. Xu, Z. Wang, M. Wang, X. Ren, G. Yuan and Q. Wang, *Electrochimica Acta*, 2020, **337**, 135738.
